# Supplementary material for: Reassortant Highly Pathogenic Influenza A H5N2 Virus Containing Gene Segments Related to Eurasian H5N8 in British Columbia, Canada, 2014
Source: PubMed Central journal article supplement (PMC4372658; doi:10.1038/srep09484), 2015-03-25
Supplement: srep09484-s1.pdf [file srep09484-s1.pdf]

# Reassortant Highly Pathogenic Influenza A H5N2 Virus Containing Gene Segments Related to Eurasian H5N8 in British Columbia, Canada, 2014

John Pasick<sup>1</sup>, Yohannes Berhane<sup>1</sup>, Tomy Joseph<sup>2</sup>, Victoria Bowes<sup>2</sup>, Tamiko Hisanaga<sup>1</sup>, Katherine Handel<sup>1</sup> & Soren Alexandersen<sup>1\*</sup>

## Phylogenetic analysis of the PB2 genes of HPAI H5N2 viruses isolated from Canadian poultry

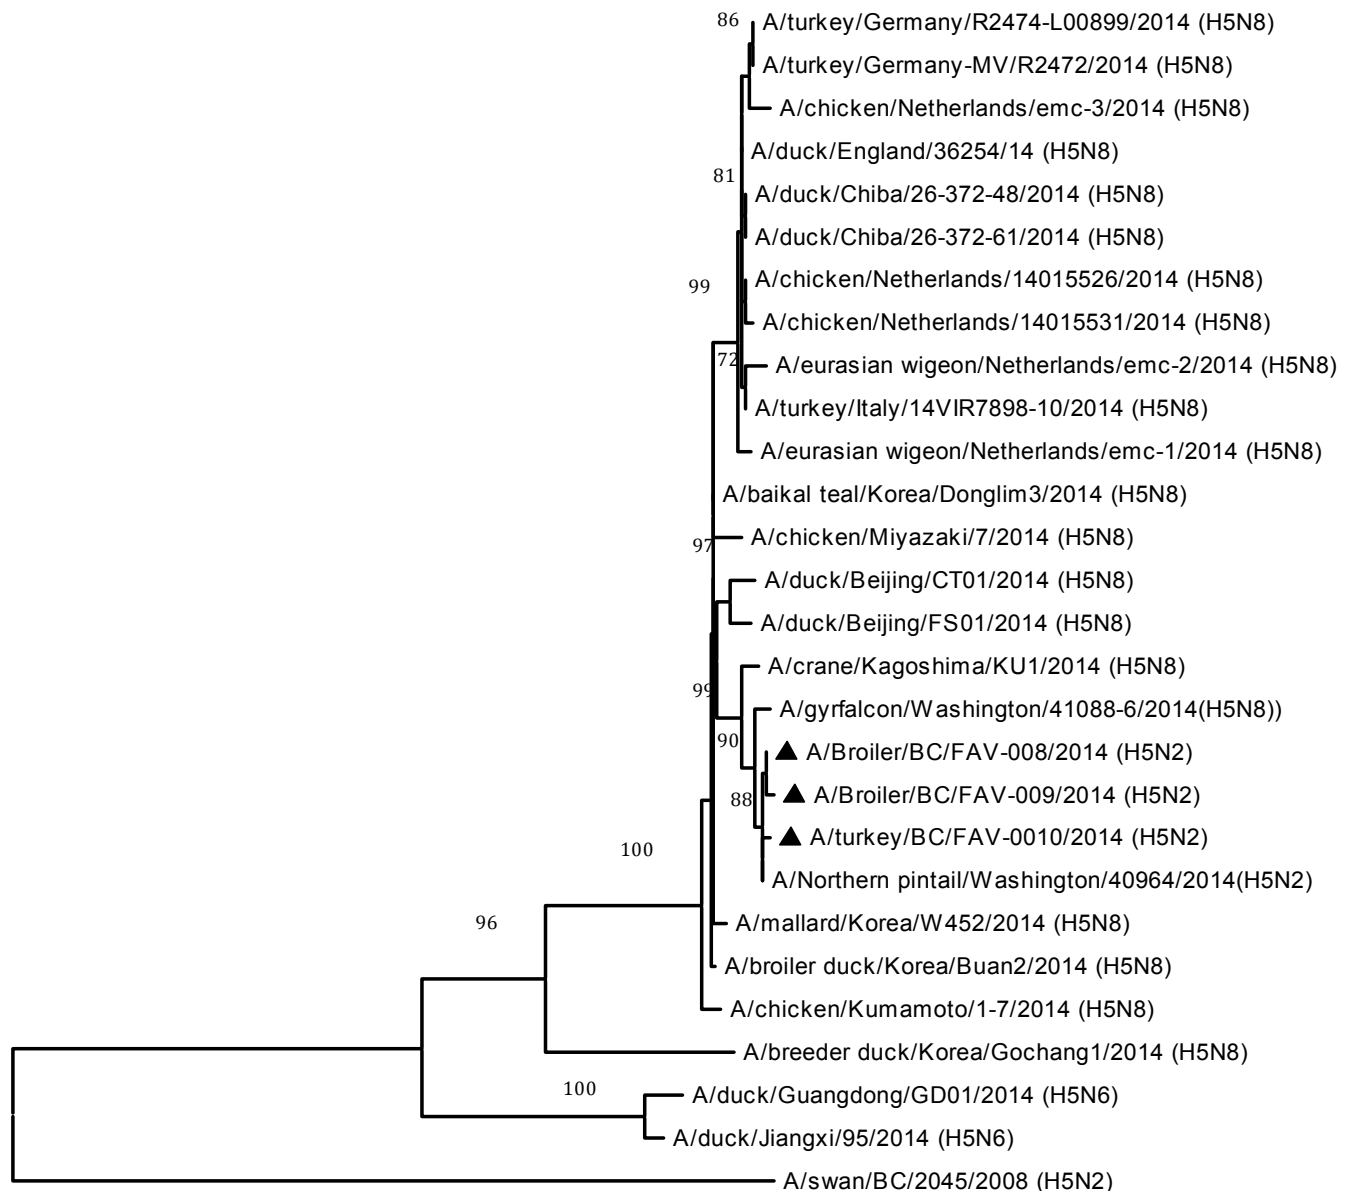

# Phylogenetic analysis of the PB1 genes of HPAI H5N2 viruses isolated from Canadian poultry

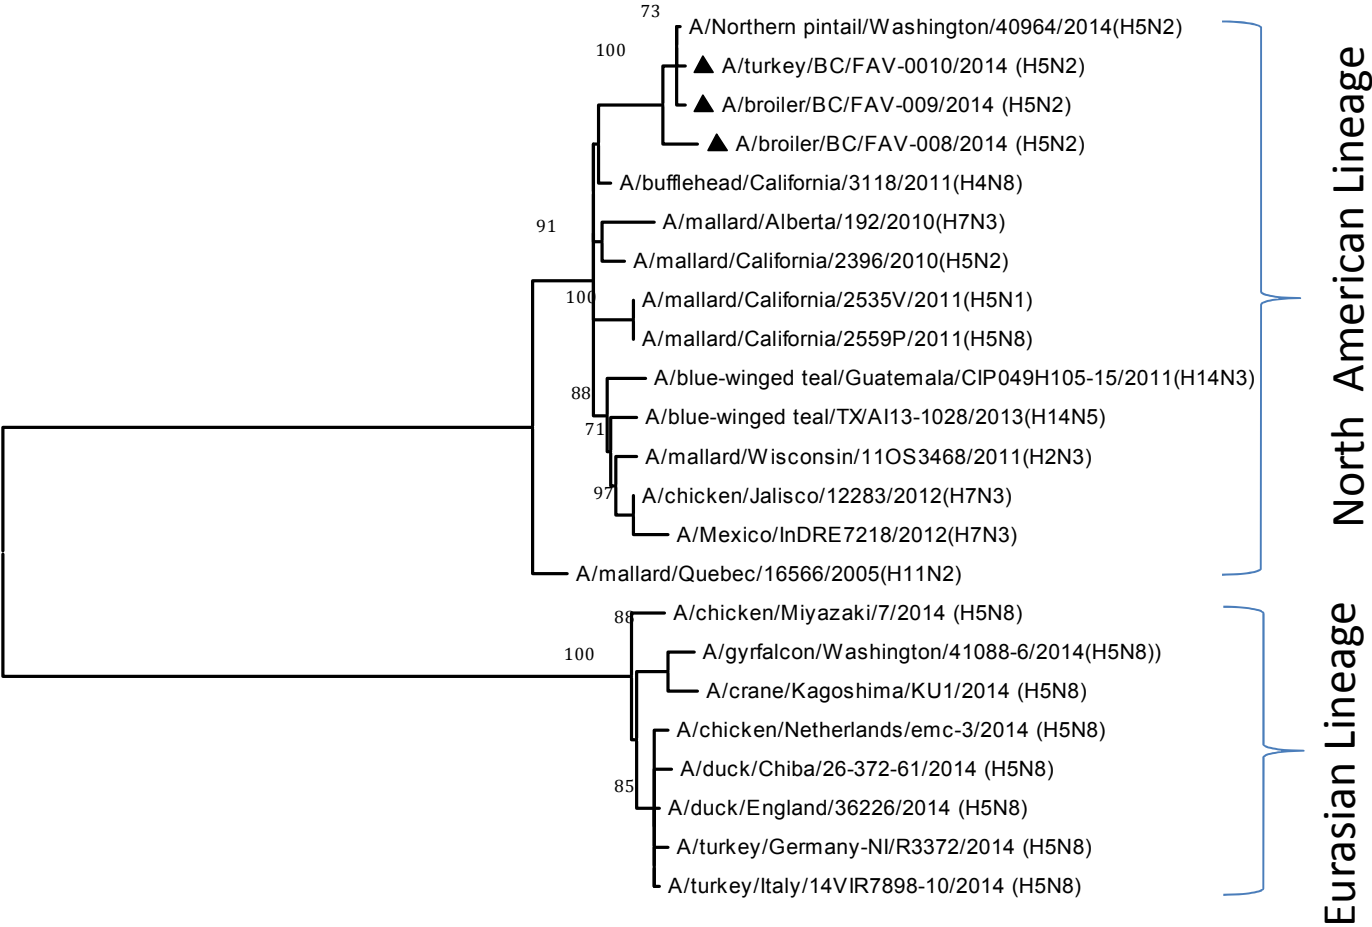

# Phylogenetic analysis of the PA genes of HPAI H5N2 viruses isolated from Canadian poultry

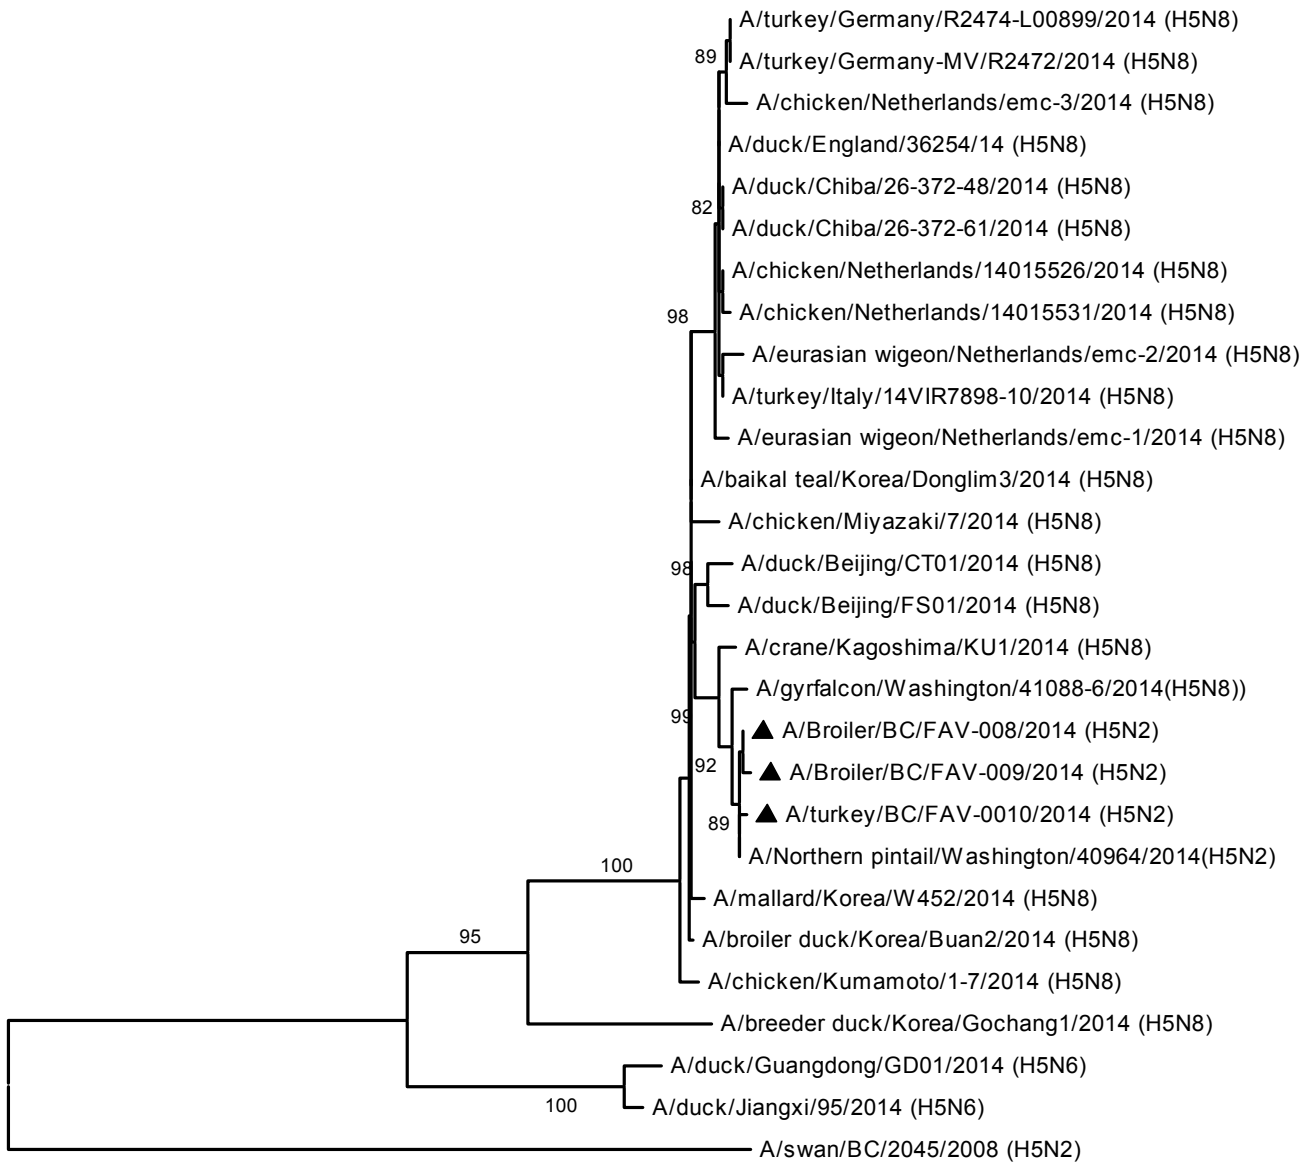

# Phylogenetic analysis of the NP genes of HPAI H5N2 viruses isolated from Canadian poultry

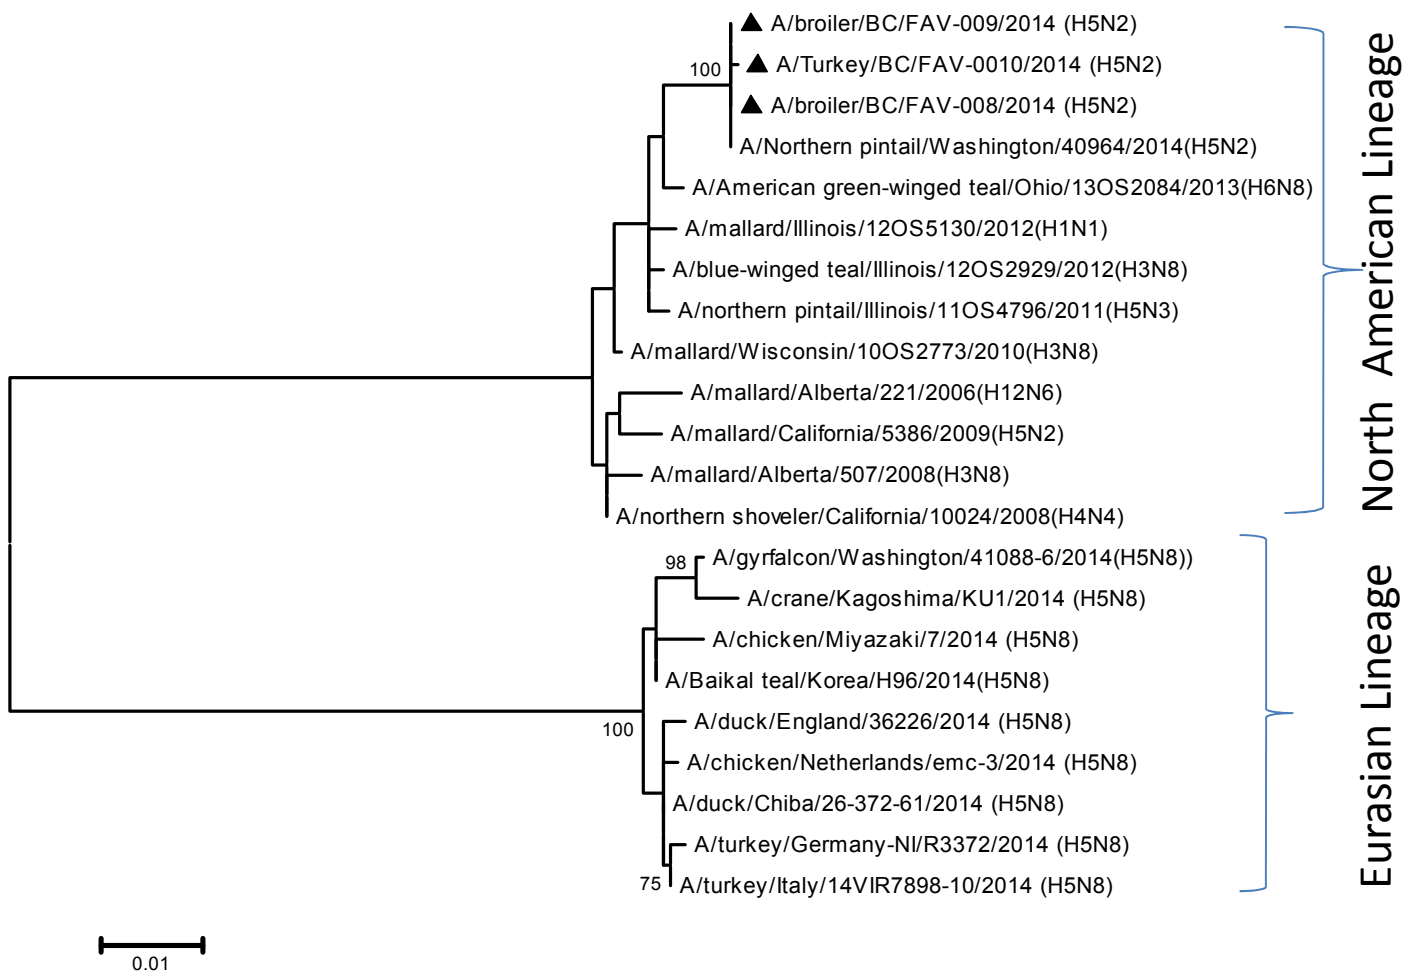

# Phylogenetic analysis of the NA genes of HPAI H5N2 viruses isolated from Canadian poultry

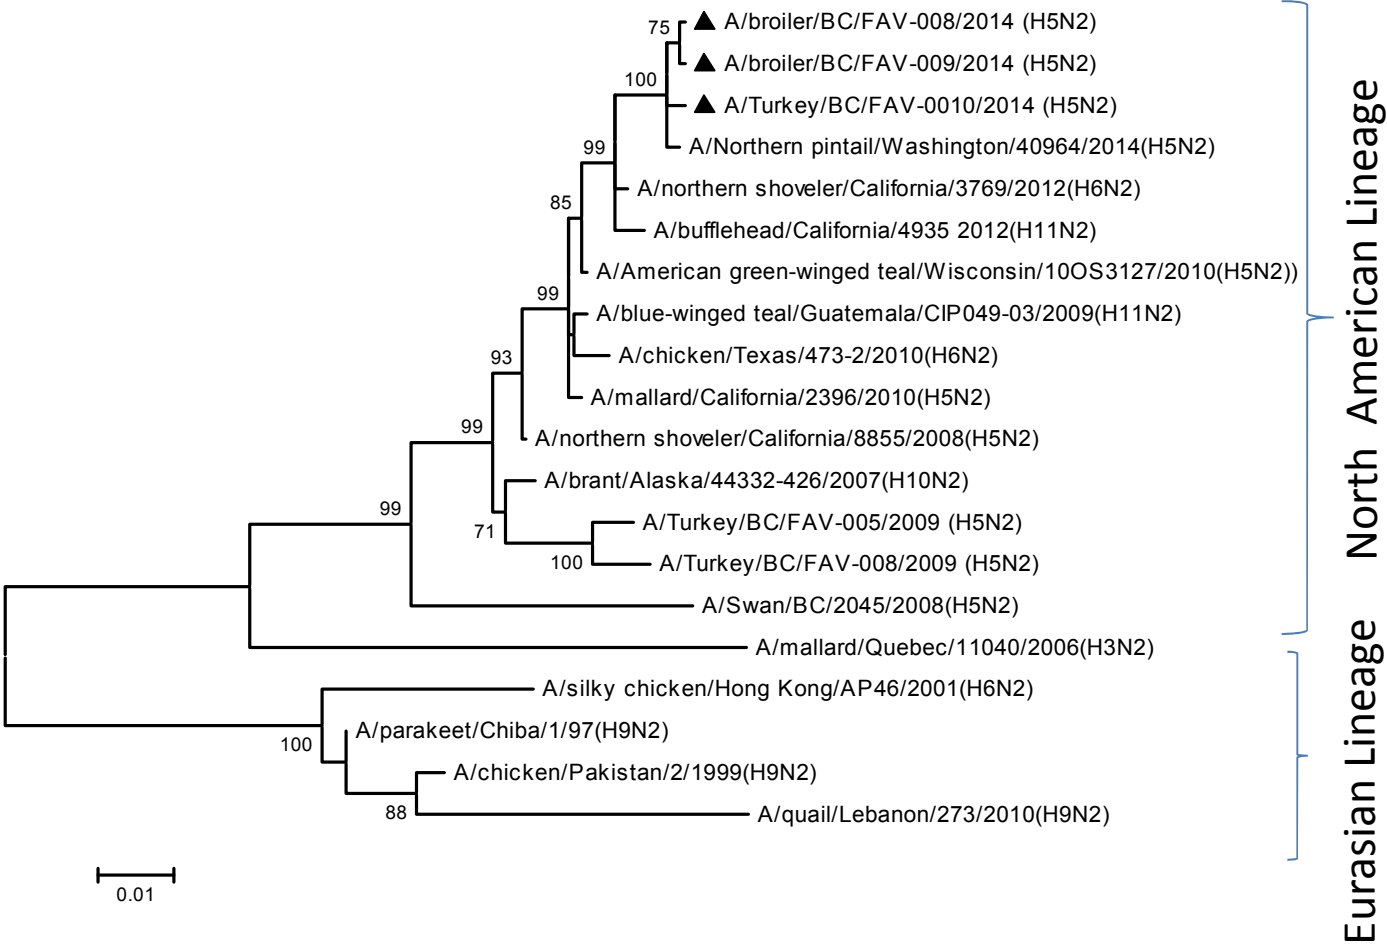

# Phylogenetic analysis of the matrix genes of HPAI H5N2 viruses isolated from Canadian poultry

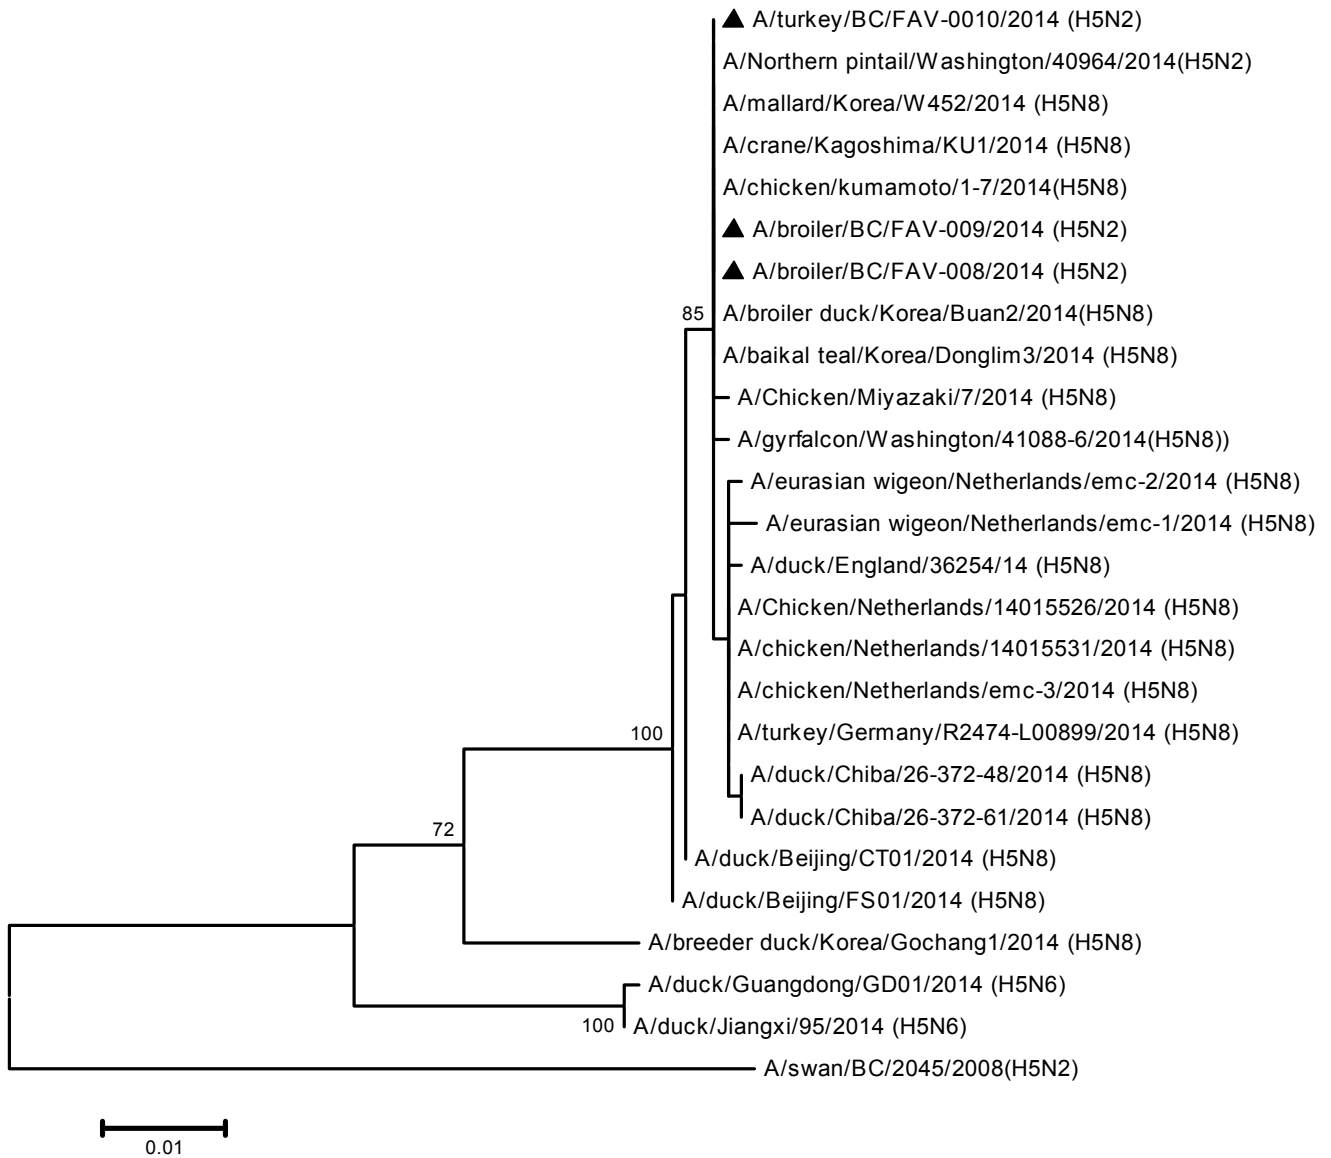

# Phylogenetic analysis of the NS genes of HPAI H5N2 viruses isolated from Canadian poultry

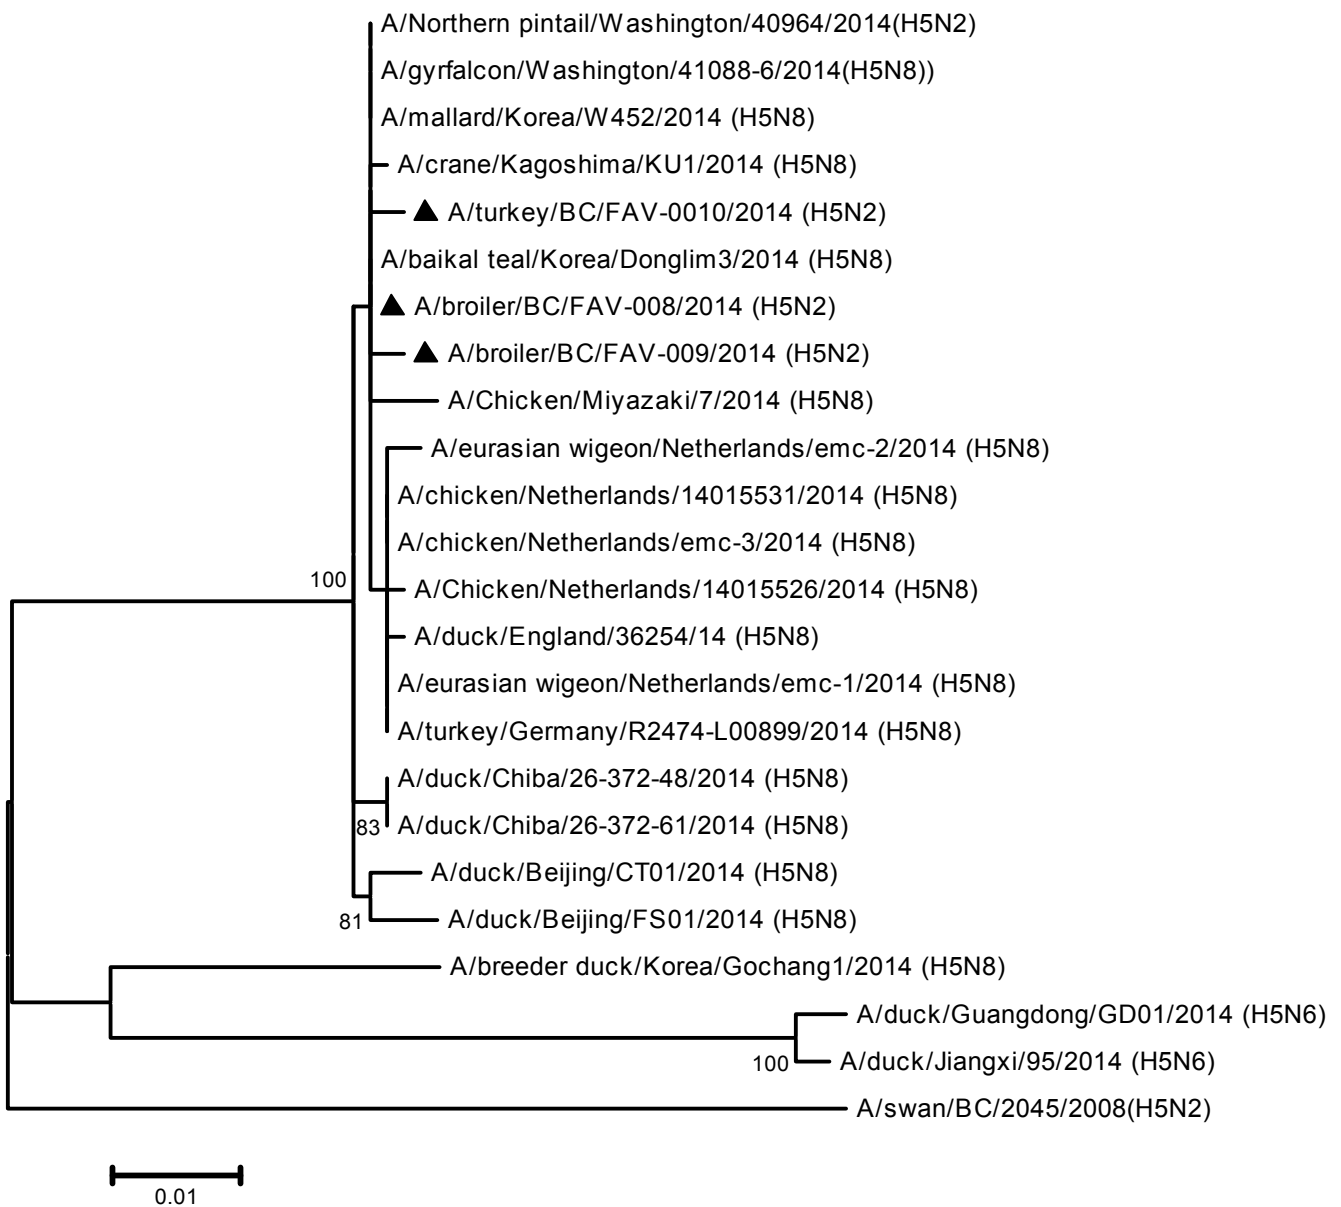

**Supplementary Figure | Molecular Phylogenetic analysis of PB2, PB1, PA, NP, NA, M and NS gene segments of HPAI H5N2 viruses isolated from Canadian poultry.**

The evolutionary history was inferred by using the Maximum Likelihood method based on the Tamura-Nei model. The tree with the highest log likelihood is shown. The percentage of trees in which the associated taxa clustered together is shown next to the branches. Initial tree(s) for the heuristic search were obtained by applying the Neighbor-Joining method to a matrix of pairwise distances estimated using the Maximum Composite Likelihood (MCL) approach. The tree is drawn to scale, with branch lengths measured in the number of substitutions per site. All positions containing gaps and missing data were eliminated. 500 bootstrap replicates were used to determine the reliability of the inferred trees with only bootstrap values above 70% shown. Evolutionary analyses were conducted in MEGA6.



**Supplemental table 1: Acknowledgment of GISAID submitters**

We acknowledge the authors, originating and submitting laboratories of the sequences from GISAID's EpiFlu™ Database on which this research is based. The list is detailed below. All submitters of data may be contacted directly via the GISAID website [www.gisaid.org](http://www.gisaid.org)

| Isolate Id     | Isolate Name                             | Location                                                                                    | Isolate Submitter                                                                                                    | Submitting Lab                                      | Authors                                                                                                                                                                                                                                             | Originating Lab                                                        |
|----------------|------------------------------------------|---------------------------------------------------------------------------------------------|----------------------------------------------------------------------------------------------------------------------|-----------------------------------------------------|-----------------------------------------------------------------------------------------------------------------------------------------------------------------------------------------------------------------------------------------------------|------------------------------------------------------------------------|
| EPI_ISL_167140 | A/turkey/Germany-MV/R2472/2014           | Europe / Germany / Mecklenburg-Vorpommern                                                   | Elke Starick (Friedrich-Loeffler-Institut)                                                                           | Friedrich-Loeffler-Institut                         |                                                                                                                                                                                                                                                     |                                                                        |
| EPI_ISL_169350 | A/turkey/Italy/14VIR7898-10/2014         | Europe / Italy / Veneto / Province of Rovigo                                                | Alice Fusaro (Istituto Zooprofilattico Sperimentale Delle Venezia)                                                   | Istituto Zooprofilattico Sperimentale Delle Venezia | Luca,Tassoni; Silvia,Ormelli; Alessia,Schivo; Alice,Fusaro; Isabella,Monne; Giovanni,Cattoli                                                                                                                                                        | Istituto Zooprofilattico Sperimentale Delle Venezia                    |
| EPI_ISL_169390 | A/crane/Kagoshima/KU1/2014               | Asia / Japan / Kagoshima                                                                    | Makoto Ozawa (Kagoshima University)                                                                                  | Kagoshima University                                |                                                                                                                                                                                                                                                     | Kagoshima University                                                   |
| EPI_ISL_169424 | A/chicken/Miyazaki/7/2014                | Asia / Japan / Miyazaki                                                                     | Takehiko Saito (National Institute of Animal Health)                                                                 | National Institute of Animal Health                 |                                                                                                                                                                                                                                                     |                                                                        |
| EPI_ISL_159719 | A/Chicken/Kumamoto/1-7/2014              | Asia / Japan / Kumamoto                                                                     | Michiyo Yoshizawa Harada (National Agriculture and Food Research Organization / National Institute of Animal Health) | National Agriculture and Food Research Organization | Kanehira,K.; Takemae,N.; Uchida,Y.; Tunekuni,R.; Hikono,H.; Saito,T.                                                                                                                                                                                | National Institute of Animal Health                                    |
| EPI_ISL_168075 | A/chicken/Netherlands/14015531/2014      | Europe / Netherlands / Provincie Utrecht / Gemeente Oudewater                               | Guus Koch (Central Veterinary Institute)                                                                             | Central Veterinary Institute                        | Heutink, Rene; Harders, Frank; Verschuren-Pritz, Sylvia; Bossers, Alex; Koch, Guus; Bouwstra, Ruth                                                                                                                                                  | Central Veterinary Institute                                           |
| EPI_ISL_167905 | A/Chicken/Netherlands/14015526/2014      | Europe / Netherlands / Provincie Utrecht / Gemeente Oudewater                               | Guus Koch (Central Veterinary Institute)                                                                             | Central Veterinary Institute                        | Heutink, Rene; Harders, Frank; Verschuren-Pritz, Sylvia; Bossers, Alex; Koch, Guus; Bouwstra, Ruth                                                                                                                                                  | Central Veterinary Institute                                           |
| EPI_ISL_168025 | A/duck/Chiba/26-372-61/2014              | Asia / Japan / Chiba                                                                        | Takehiko Saito (National Institute of Animal Health)                                                                 | National Institute of Animal Health                 |                                                                                                                                                                                                                                                     | National Institute of Animal Health                                    |
| EPI_ISL_168024 | A/duck/Chiba/26-372-48/2014              | Asia / Japan / Chiba                                                                        | Takehiko Saito (National Institute of Animal Health)                                                                 | National Institute of Animal Health                 |                                                                                                                                                                                                                                                     | National Institute of Animal Health                                    |
| EPI_ISL_167904 | A/duck/England/36254/14                  | Europe / United Kingdom / East Riding of Yorkshire                                          | Amanda Hanna (Animal and Plant Health Agency (APHA) / Virology)                                                      | Animal and Plant Health Agency (APHA)               | Hanna, Amanda; Ellis, Richard; Ceeraz, Vanessa; Seekings, James; Londt, Brandon; Brookes, Sharon; Banks, Jill; Essen, Stephen; Brown, Ian                                                                                                           | Animal and Plant Health Agency (APHA)                                  |
| EPI_ISL_166694 | A/duck/Beijing/CT01/2014                 | Asia / China / Beijing Municipality / Shunyi District                                       | Di Liu (Institute of Microbiology)                                                                                   | Institute of Microbiology                           |                                                                                                                                                                                                                                                     | Institute of Microbiology, Chinese Academy of Sciences                 |
| EPI_ISL_166693 | A/duck/Beijing/FS01/2014                 | Asia / China / Beijing Municipality / Fangshan District                                     | Di Liu (Institute of Microbiology)                                                                                   | Institute of Microbiology                           |                                                                                                                                                                                                                                                     | Institute of Microbiology, Chinese Academy of Sciences                 |
| EPI_ISL_157610 | A/broiler duck/Korea/Buan2/2014          | Asia / Korea, Republic of                                                                   | Initial import                                                                                                       | Other Database Import                               | Lee,Y.-J.; Kang,H.-M.; Lee,E.-K.; Song,B.-M.; Jeong,J.; Kwon,Y.-K.; Kim,H.-R.; Lee,K.-J.; Hong,M.-S.; Jang,I.; Choi,K.-S.; Kim,J.-Y.; Lee,H.-J.; Kang,M.-S.; Jeong,O.-M.; Baek,J.-H.; Joo,Y.-S.; Park,Y.Ho.; Lee,H.-S.; Park,Y.H.                   |                                                                        |
| EPI_ISL_157609 | A/breeder duck/Korea/Gochang1/2014       | Asia / Korea, Republic of                                                                   | Initial import                                                                                                       | Other Database Import                               | Lee,Y.-J.; Kang,H.-M.; Lee,E.-K.; Song,B.-M.; Jeong,J.; Kwon,Y.-K.; Kim,H.-R.; Lee,K.-J.; Hong,M.-S.; Jang,I.; Choi,K.-S.; Kim,J.-Y.; Lee,H.-J.; Kang,M.-S.; Jeong,O.-M.; Baek,J.-H.; Joo,Y.-S.; Park,Y.Ho.; Lee,H.-S.; Park,Y.H.                   |                                                                        |
| EPI_ISL_171704 | A/Baikal teal/Korea/H96/2014             | Asia / Korea, Republic of                                                                   | Initial import                                                                                                       | Other Database Import                               | Jeong,J.; Kang,H.M.; Lee,E.K.; Song,B.M.; Kwon,Y.K.; Kim,H.R.; Choi,K.S.; Kim,J.Y.; Lee,H.J.; Moon,O.K.; Jeong,W.; Choi,J.; Baek,J.H.; Joo,Y.S.; Park,Y.H.; Lee,H.S.; Lee,Y.J.; Lee,Y.-J.; Kang,H.-M.; Lee,E.-K.; Song,B.-M.; Lee,K.-J.; Hong,M.-S. |                                                                        |
| EPI_ISL_157611 | A/baikal teal/Korea/Donglim3/2014        | Asia / Korea, Republic of                                                                   | Initial import                                                                                                       | Other Database Import                               | Lee,Y.-J.; Kang,H.-M.; Lee,E.-K.; Song,B.-M.; Jeong,J.; Kwon,Y.-K.; Kim,H.-R.; Lee,K.-J.; Hong,M.-S.; Jang,I.; Choi,K.-S.; Kim,J.-Y.; Lee,H.-J.; Kang,M.-S.; Jeong,O.-M.; Baek,J.-H.; Joo,Y.-S.; Park,Y.Ho.; Lee,H.-S.; Park,Y.H.                   |                                                                        |
| EPI_ISL_169281 | A/eurasian wigeon/Netherlands/emc-2/2014 | Europe / Netherlands / Provincie Utrecht / Gemeente Woerden / Between Kamerik and Kockengen | Josanne Verhagen (Erasmus Medical Center / Department of Virology)                                                   | Erasmus Medical Center                              | Fouchier, Ron A.M.; Verhagen, Josanne H.; Vuong, Oanh; Bestebroer, Theo; Van Vliet, Stefan; Van der Jeugd, Henk                                                                                                                                     | Erasmus Medical Center                                                 |
| EPI_ISL_169280 | A/eurasian wigeon/Netherlands/emc-1/2014 | Europe / Netherlands / Provincie Utrecht / Gemeente Woerden / Between Kamerik and Kockengen | Josanne Verhagen (Erasmus Medical Center / Department of Virology)                                                   | Erasmus Medical Center                              | Fouchier, Ron A.M.; Verhagen, Josanne H.; Vuong, Oanh; Bestebroer, Theo; Van Vliet, Stefan; Van der Jeugd, Henk                                                                                                                                     | Erasmus Medical Center                                                 |
| EPI_ISL_161972 | A/duck/Jiangxi/95/2014                   |                                                                                             | Guang Liu (BGI Shenzhen)                                                                                             | BGI Shenzhen                                        | Bing,Xu;Tao,Zhang;Xiaowen,Li                                                                                                                                                                                                                        |                                                                        |
| EPI_ISL_162467 | A/duck/Guangdong/GD01/2014               |                                                                                             | Initial import                                                                                                       | Other Database Import                               | Shen,H.; Xie,Q.                                                                                                                                                                                                                                     |                                                                        |
| EPI_ISL_139385 | A/duck/Jiangsu/k1203/2010                |                                                                                             | Initial import                                                                                                       | Other Database Import                               | Zhao,K.; Gu,M.; Zhong,L.; Duan,Z.; Zhang,Y.; Zhu,Y.; Zhao,G.; Zhao,M.; Chen,Z.; Hu,S.; Liu,W.; Liu,X.; Peng,D.                                                                                                                                      |                                                                        |
| EPI_ISL_156815 | A/mallard duck/Shanghai/SH-9/2013        | Fan Sheng Tao (Institute of Laboratory Animal Sciences, Chinese Academy)                    | Institute of Laboratory Animal Sciences, Chinese Academy                                                             |                                                     | Fan,S.; Gao,X.;Ying,Y.; Guo,J.; Sun,W.; Wang,T.;Ren,Z.; Yu,Z.; Li,Y.; Zhao,Y.; Yang,S.;Gao,Y. ; Xia,X.                                                                                                                                              | Institute of Military Veterinary, Academy of Military Medical Sciences |
